# Supplementary material for: Mapping the Energetic Costs of Free-Swimming Gilthead Sea Bream (Sparus aurata), a Key Species in European Marine Aquaculture
Source: MDPI journal article supplement (doi:10.3390/biology10121357), 2021-12-20
Supplement: s1 [file s1]

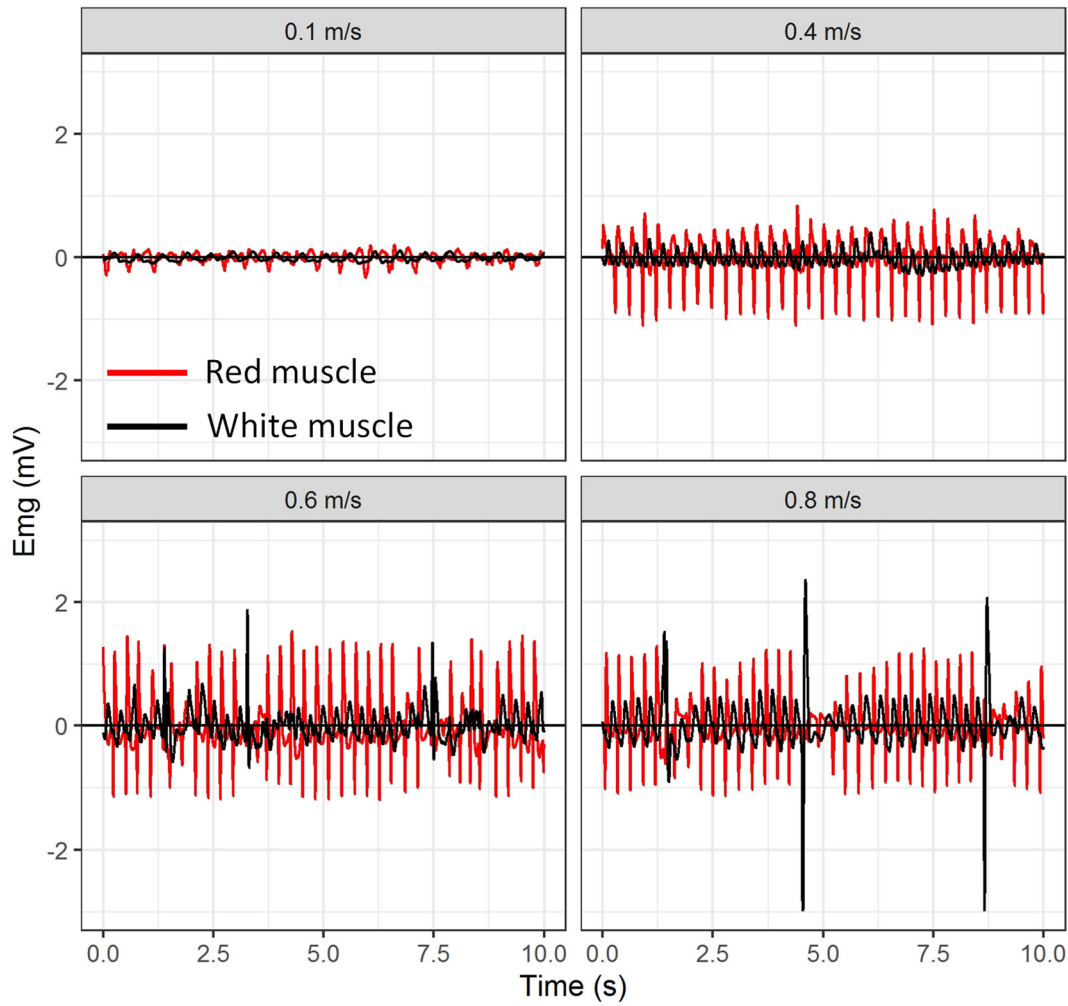

**Figure S1.** Sample of 10 seconds EMG signal (Millivolts, mV) of both red (red line) and white muscles (black line) at four different water speed: 0.1, 0.4, 0.6 and 0.8 m/s recorded during a critical swimming test in Gilt-head Sea bream (*Sparus aurata*).

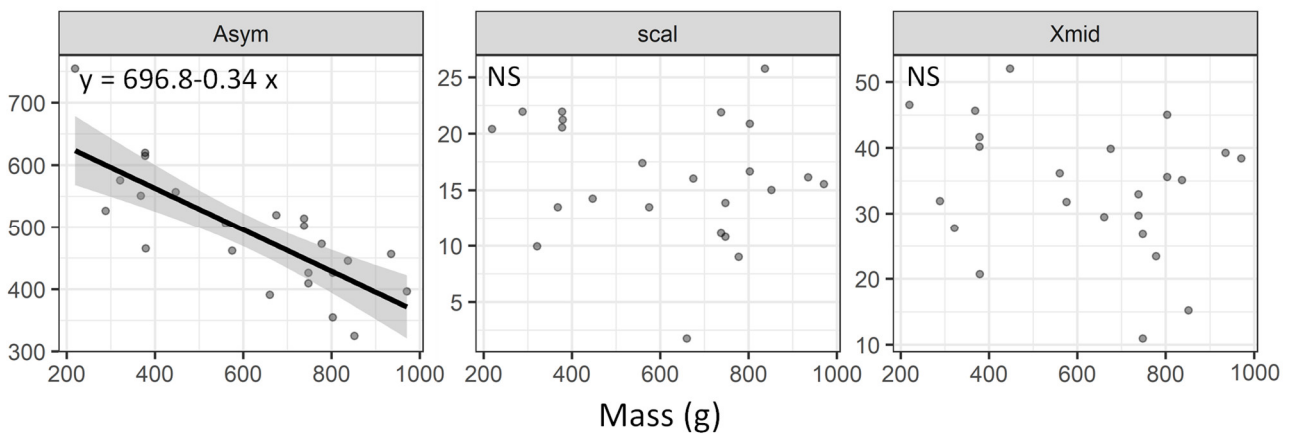

**Figure S2.** Linear regressions of the parameters (Asym, xmid and scal) from the SSlogis model obtained for each fish as function of mass in Gilt-head Sea bream (*Sparus aurata*; n=26). The black line represents a significant linear regression between parameter and fish mass, and the grey shape represents the 95 % confidence interval. Not significant (NS) is mentioned for each non significative parameter.

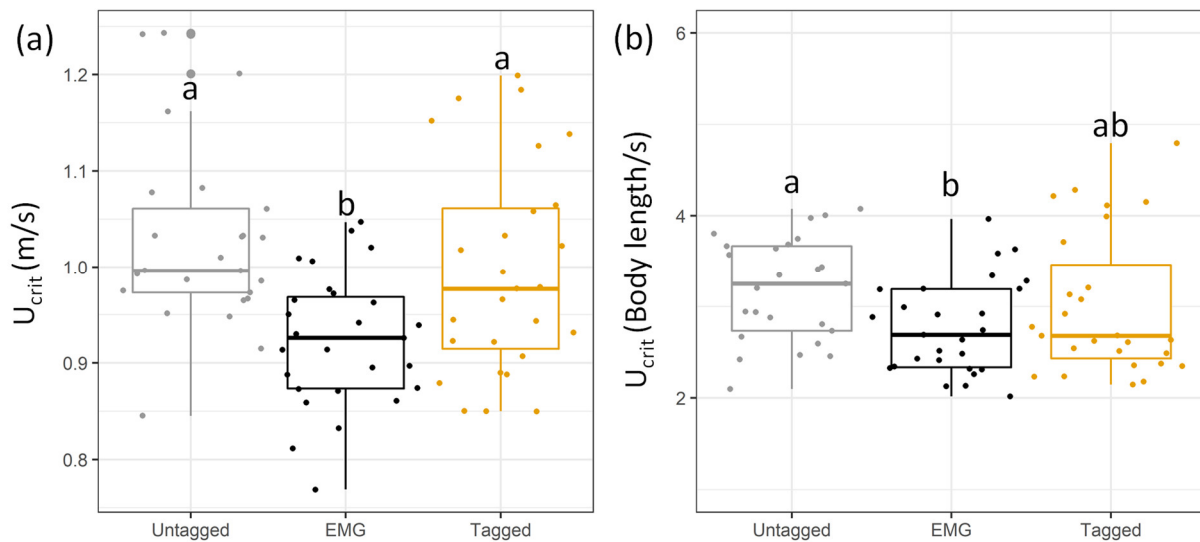

**Figure S3.** Swimming performances during  $U_{crit}$  trial according to their condition in Gilt-head Sea bream (*Sparus aurata*; Untagged, n=25, grey dots; EMG, n=27, black dots or tagged, n=27, orange dots). **(a)** Absolute and **(b)** relative  $U_{crit}$  values (m/s and BL/s) as function (untagged fish, n=25, grey points; tagged fish, n=27, orange points). The central line of the boxplot indicates the median and the boxes the quartiles, with the whiskers covering 95% of the values. Different letters indicate significant statistical difference between conditions (Kruskal-Wallis followed by followed by Dunn's-test adjusted by Bonferroni,  $p < 0.05$ ).

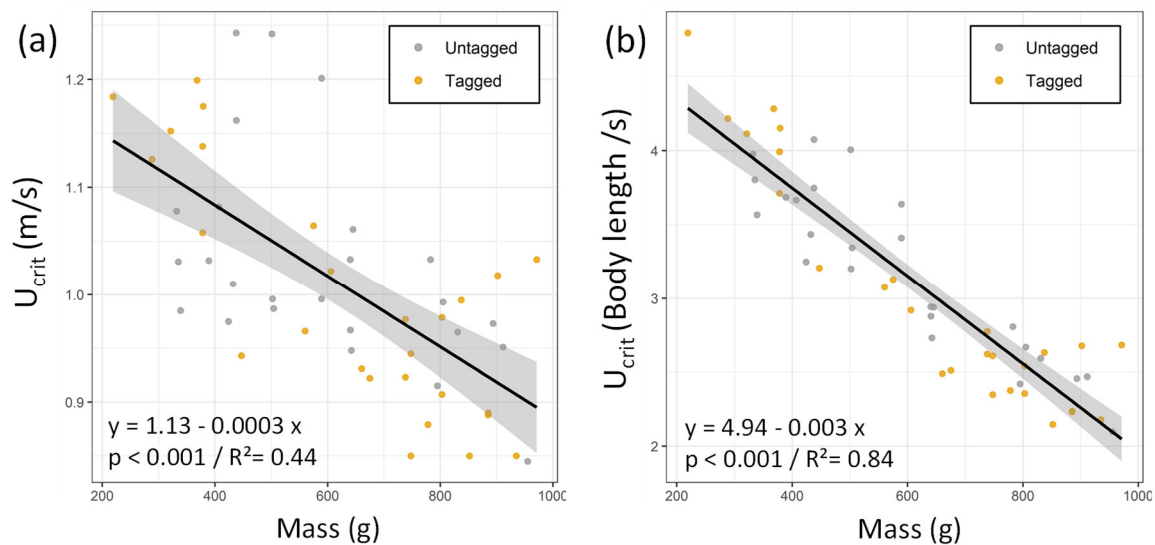

**Figure S4.** Swimming performances of Gilt-head Sea bream (*Sparus aurata*) during  $U_{crit}$  trial. **(a)** Absolute and **(b)** relative  $U_{crit}$  values (m/s and BL/s) as function of fish mass (g) and tagging condition (grey dots, n=25 grey dots; orange dots, n=27, tagged fish). The black line represents the significant linear regression between the  $U_{crit}$  and mass, and grey shape indicates the 95 % confidence interval of the regression. Equation, p values and  $R^2$  are reported for each variable and the interaction of both (Linear regression,  $p < 0.05$ ).

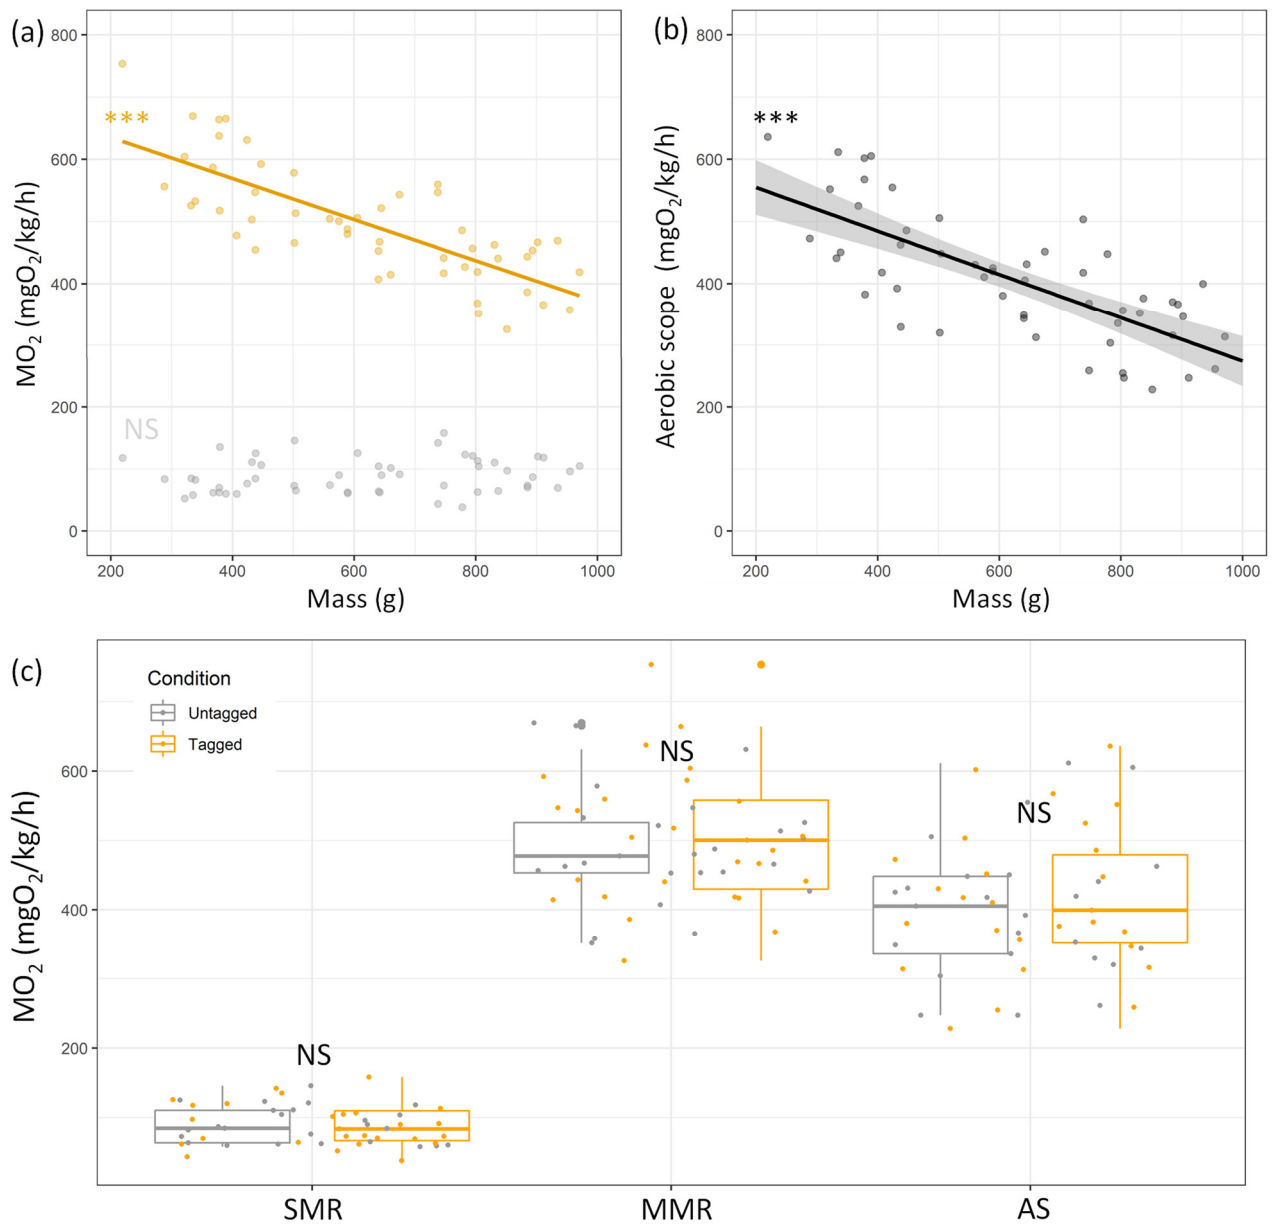

**Figure S5.** Metabolic variables as a function of fish mass in Gilt-head Sea bream and tagging condition (*Sparus aurata*; n = 52). **(a)** Standard and maximum metabolic rates (SMR, grey dots and MMR, orange dots); **(b)** Aerobic scope (AS;  $MO_2$ , mgO<sub>2</sub>/kg/h) and **(c)** metabolic traits (SMR, MMR and AS) depending on tagging condition (untagged in dark grey and tagged in orange). Each dot represents the metabolic variables of a single fish. For panel (a), the grey line represents the SMR and the orange line represents linear regression for the MMR values. For panel (b), the black line represents linear regression for the AS and the grey shape represents the 95 % confidence interval. For panels **(a)** and **(b)**, significance of the linear regressions is indicated according to Linear regression, and for panel **(c)** according to Student t-test (\*\*\*: p < 0.001 / not significant (NS)).

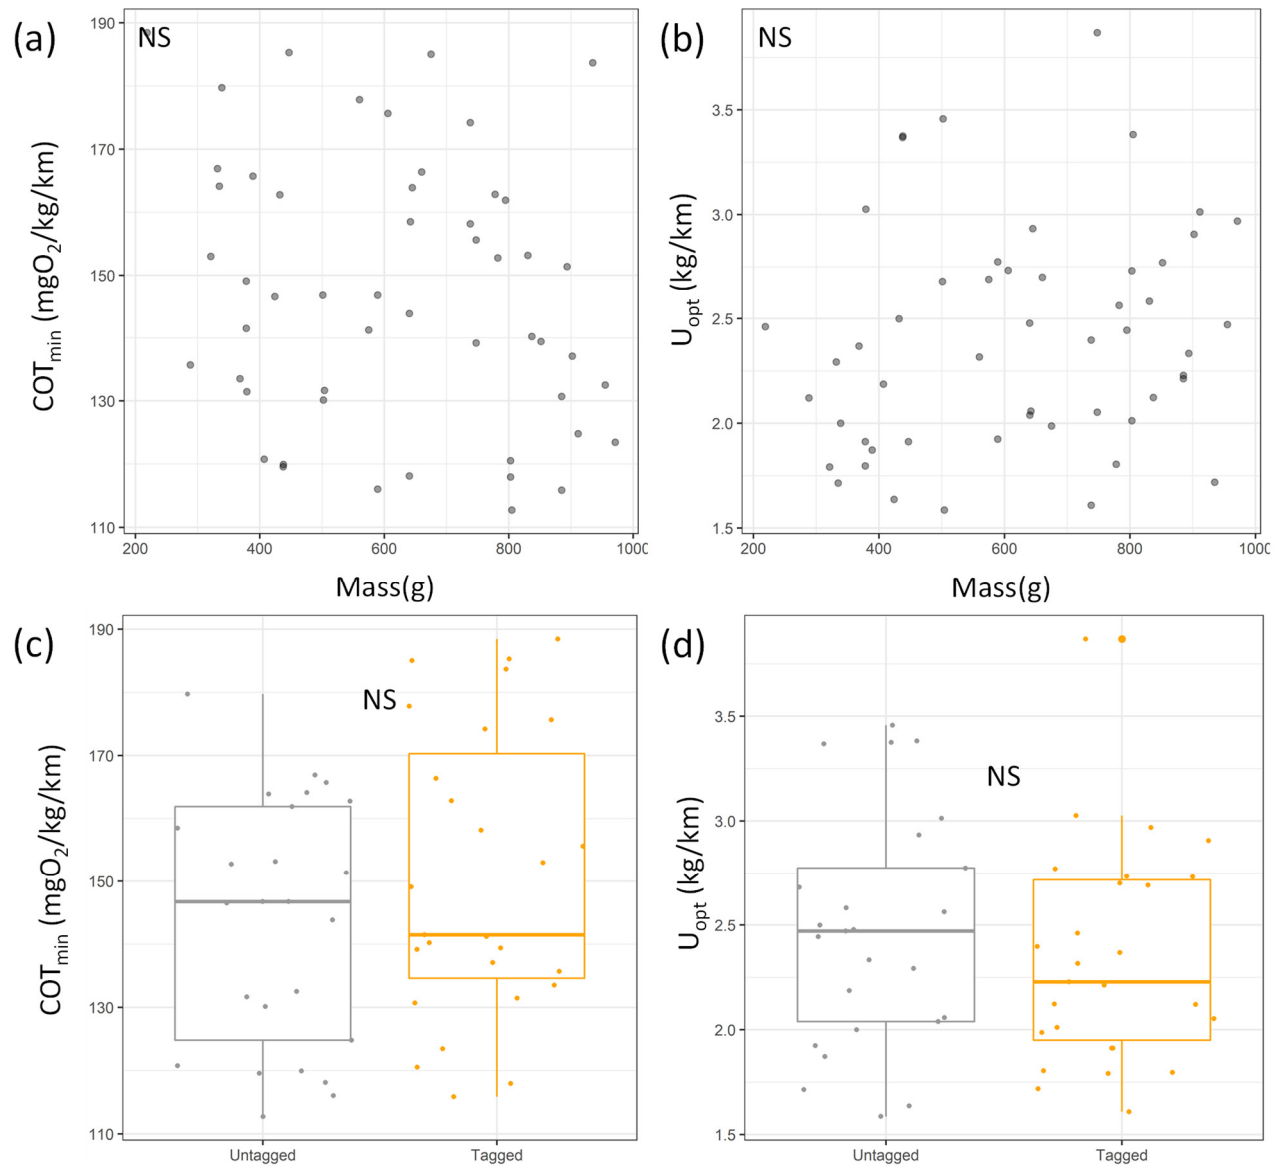

**Figure S6.** Swimming efficiency and cost of transport in Gilt-head Sea bream (*Sparus aurata*; n=52 fish). **(a)**  $COT_{min}$  (mgO<sub>2</sub>/kg/km) and **(b)**  $U_{opt}$  (kg/km) as function of fish mass; and **(c)**  $COT_{min}$  (mgO<sub>2</sub>/kg/km) and **(d)**  $U_{opt}$  (kg/km) as function of fish tagging procedure (untagged fish, n=25, grey points; tagged fish, n=27, orange points). The central line of the boxplot indicates the median and the boxes the quartiles, with the whiskers covering 95% of the values. For panels **(a)** and **(b)**, statistics are indicated according to linear regressions, and for panels **(c)** and **(d)**, statistics are indicated according to Student t-test (Not significant (NS):  $p > 0.05$ ).

**Table S1.** Outputs of linear model for fitting the swimming performances (absolute and relative Ucrit) as a function of mass (g) and condition (untagged or tagged) in Gilt-head Sea bream (*Sparus aurata*). Associated R<sup>2</sup> are 0.44 and 0.83 for absolute and relative Ucrit respectively.

| Absolute Ucrit   |          |            |         |         |
|------------------|----------|------------|---------|---------|
| Parameter        | Estimate | Std. error | t value | p value |
| (intercept)      | 1.24     | 0.047      | 26.66   | <0.001  |
| Mass             | -0.0004  | 0.000068   | -5.58   | <0.001  |
| Condition        | -0.066   | 0.069      | -0.96   | 0.34    |
| Mass : condition | 0.0013   | 0.00011    | 1.24    | 0.22    |
| Relative Ucrit   |          |            |         |         |
| Parameter        | Estimate | Std. error | t value | p value |
| (intercept)      | 5.07     | 0.16       | 30.96   | <0.001  |
| Mass             | -0.003   | 0.002      | -13.36  | <0.001  |
| Condition        | -0.33    | 0.24       | -1.35   | 0.18    |
| Mass : condition | 0.0006   | 0.004      | 1.53    | 0.13    |

**Table S2.** Outputs of sigmoid model for fitting the MO2 as a function of swimming activity (AU) during Ucrit for each tagged Gilt-head Sea bream (*Sparus aurata*; n = 23 fish). P value and R<sup>2</sup> are shown for each model. Estimate, standard error and level of significance are presented for each parameter of the model (Asym, xmid and scal) are indicated. For the level of significance, not significant (NS) is indicated for p>0.1, # for 0.05 <p<0.1, \* for p<0.05, \*\* for p<0.01 and \*\*\* for p<0.001.

| Fish ID | Mass   | Estimate ± std. error (significance) |                    |                    | p value | R <sup>2</sup> |
|---------|--------|--------------------------------------|--------------------|--------------------|---------|----------------|
|         |        | Asym                                 | Xmid               | scal               |         |                |
| 1       | 219    | 754.45 ± 38.86 (***)                 | 46.56 ± 3.39 (***) | 20.41 ± 3.1 (***)  | <0.001  | 0.93           |
| 2       | 288.4  | 526.54 ± 18.12 (***)                 | 31.94 ± 2.57 (***) | 21.94 ± 3.08 (***) | <0.001  | 0.98           |
| 3       | 368    | 551.08 ± 11.88 (***)                 | 45.63 ± 1.32 (***) | 13.49 ± 1.48 (***) | <0.001  | 0.98           |
| 4       | 379    | 465.05 ± 12.20 (***)                 | 20.7 ± 2.20 (***)  | 21.24 ± 3.68 (**)  | <0.001  | 0.99           |
| 5       | 321.2  | 575.67 ± 12.92 (***)                 | 27.76 ± 1.64 (***) | 9.94 ± 1.75 (**)   | <0.001  | 0.96           |
| 6       | 378    | 614.98 ± 30.09 (***)                 | 40.22 ± 4.15 (***) | 21.94 ± 4.10 (**)  | <0.001  | 0.95           |
| 7       | 378    | 619.6 ± 12.82 (***)                  | 41.67 ± 1.61 (***) | 20.55 ± 1.46 (***) | <0.001  | 0.99           |
| 8       | 447    | 556.59 ± 46.68 (***)                 | 52.04 ± 3.80 (***) | 14.26 ± 3.82 (*)   | <0.001  | 0.93           |
| 9       | 575    | 461.88 ± 26.43 (***)                 | 31.79 ± 2.84 (***) | 13.49 ± 3.42 (*)   | <0.001  | 0.95           |
| 10      | 560    | 506.5 ± 32.83 (***)                  | 36.18 ± 5.42 (**)  | 17.4 ± 5.64 (*)    | <0.001  | 0.9            |
| 11      | 675    | 519.85 ± 28.90 (***)                 | 39.85 ± 3.20 (***) | 16.02 ± 3.63 (*)   | <0.001  | 0.96           |
| 12      | 660.2  | 390.78 ± 20.41 (***)                 | 29.47 ± 0.58 (***) | 1.77 ± 0.84 (NS)   | <0.001  | 0.95           |
| 14      | 777.87 | 472.44 ± 23.21 (***)                 | 23.45 ± 2.20 (***) | 9.02 ± 2.59 (*)    | <0.001  | 0.95           |
| 15      | 738    | 514.34 ± 25.41 (***)                 | 29.74 ± 3.27 (***) | 21.9 ± 4.52 (**)   | <0.001  | 0.98           |
| 16      | 738    | 501.86 ± 11.31 (***)                 | 32.99 ± 1.18 (***) | 11.13 ± 1.21 (***) | <0.001  | 0.99           |
| 17      | 747.59 | 426.07 ± 17.44 (***)                 | 26.81 ± 1.96 (***) | 10.80 ± 2.72 (*)   | <0.001  | 0.98           |
| 18      | 747.59 | 408.95 ± 5.00 (***)                  | 10.94 ± 1.31 (**)  | 13.87 ± 1.56 (**)  | <0.001  | 0.99           |

|    |       |                      |                    |                    |        |      |
|----|-------|----------------------|--------------------|--------------------|--------|------|
| 19 | 851.7 | 324.88 ± 25.99 (**)  | 15.23 ± 4.52 (*)   | 15 ± 5.90 (#)      | <0.001 | 0.98 |
| 22 | 837   | 445.15 ± 6.64 (***)  | 35.13 ± 12.01 (*)  | 25.76 ± 17.16 (NS) | <0.001 | 0.78 |
| 23 | 803   | 354.94 ± 36.39 (***) | 35.59 ± 5.91 (**)  | 20.89 ± 8.36 (#)   | <0.001 | 0.97 |
| 24 | 803   | 426.03 ± 9.19 (***)  | 45.06 ± 1.31 (***) | 16.66 ± 1.43 (***) | <0.001 | 0.99 |
| 25 | 935   | 456.41 ± 5.82 (***)  | 39.28 ± 0.70 (***) | 16.14 ± 0.87 (***) | <0.001 | 0.99 |
| 26 | 971   | 396.22 ± 11.58 (***) | 38.4 ± 1.67 (***)  | 15.53 ± 2.5 (**)   | <0.001 | 0.99 |

**Table S3.** Outputs of sigmoid model for fitting the MO<sub>2</sub> as a function of swimming speed (m/s) during Ucrit for each Gilt-head Sea bream (*Sparus aurata*; n=25 untagged and n=27 tagged fish). P value and R<sup>2</sup> are shown for each model. (a) Estimate, standard error and level of significance are presented for each parameter of the model (A<sub>sym</sub>, x<sub>mid</sub> and scal) are also indicated. For the level of significance, not significant (NS) is indicated for p>0.1, # for 0.05 <p<0.1, \* for p<0.05, \*\* for p<0.01 and \*\*\* for p<0.001.

| Estimate ± std. error (significance) |           |          |                      |                   |                   |         |                |
|--------------------------------------|-----------|----------|----------------------|-------------------|-------------------|---------|----------------|
| Fish ID                              | Condition | Mass (g) | A <sub>sym</sub>     | x <sub>mid</sub>  | scal              | p value | R <sup>2</sup> |
| 1                                    | Untagged  | 332      | 531.61 ± 13.78 (***) | 0.29 ± 0.02 (***) | 0.17 ± 0.02 (***) | <0.001  | 0.99           |
| 2                                    | Untagged  | 335      | 731.33 ± 68.43 (***) | 0.52 ± 0.05 (***) | 0.21 ± 0.03 (**)  | <0.001  | 0.97           |
| 3                                    | Untagged  | 339      | 546.31 ± 56.21 (***) | 0.31 ± 0.06 (**)  | 0.18 ± 0.06 (*)   | <0.001  | 0.92           |
| 4                                    | Untagged  | 389      | 750.47 ± 95.84 (**)  | 0.56 ± 0.07 (**)  | 0.23 ± 0.05 (**)  | <0.001  | 0.97           |
| 5                                    | Untagged  | 437.8    | 658.06 ± 191.5 (*)   | 0.68 ± 0.24 (*)   | 0.36 ± 0.13 (*)   | <0.001  | 0.91           |
| 6                                    | Untagged  | 437.6    | 544.67 ± 104.19 (**) | 0.5 ± 0.18 (*)    | 0.41 ± 0.13 (*)   | <0.001  | 0.97           |
| 7                                    | Untagged  | 424      | 840.94 ± 329.03 (#)  | 0.66 ± 0.26 (#)   | 0.29 ± 0.12 (#)   | <0.001  | 0.89           |
| 8                                    | Untagged  | 432      | 538.16 ± 52.24 (***) | 0.34 ± 0.06 (**)  | 0.25 ± 0.06 (**)  | <0.001  | 0.97           |
| 9                                    | Untagged  | 407      | 525.81 ± 65.88 (***) | 0.51 ± 0.08 (***) | 0.25 ± 0.06 (**)  | <0.001  | 0.95           |
| 10                                   | Untagged  | 501.2    | 597.05 ± 44.32 (***) | 0.45 ± 0.05 (***) | 0.23 ± 0.05 (**)  | <0.001  | 0.94           |

|    |          |        |                      |                   |                   |        |      |
|----|----------|--------|----------------------|-------------------|-------------------|--------|------|
| 11 | Untagged | 589.3  | 515.76 ± 65.35 (***) | 0.52 ± 0.09 (***) | 0.26 ± 0.07 (**)  | <0.001 | 0.93 |
| 12 | Untagged | 589.3  | 508.63 ± 39.1 (***)  | 0.38 ± 0.04 (***) | 0.19 ± 0.04 (**)  | <0.001 | 0.97 |
| 13 | Untagged | 502    | 882.32 ± 1066.7 (NS) | 0.93 ± 1.36 (NS)  | 0.58 ± 0.41 (NS)  | <0.001 | 0.95 |
| 14 | Untagged | 504    | 610.34 ± 283.15 (#)  | 0.55 ± 0.28 (NS)  | 0.26 ± 0.14 (NS)  | <0.001 | 0.91 |
| 15 | Untagged | 640.4  | 460.91 ± 61.27 (***) | 0.46 ± 0.09 (**)  | 0.25 ± 0.06 (**)  | <0.001 | 0.98 |
| 16 | Untagged | 640.21 | 489.1 ± 37.95 (***)  | 0.35 ± 0.05 (**)  | 0.27 ± 0.05 (**)  | <0.001 | 0.99 |
| 17 | Untagged | 644.89 | 541.14 ± 70.86 (**)  | 0.35 ± 0.07 (**)  | 0.22 ± 0.1 (#)    | <0.001 | 0.94 |
| 18 | Untagged | 642    | 483.9 ± 63.74 (**)   | 0.34 ± 0.07 (**)  | 0.18 ± 0.06 (*)   | <0.001 | 0.94 |
| 19 | Untagged | 794.86 | 508.47 ± 84.42 (**)  | 0.32 ± 0.11 (*)   | 0.27 ± 0.1 (*)    | <0.001 | 0.97 |
| 20 | Untagged | 782.5  | 438.94 ± 42.73 (***) | 0.21 ± 0.06 (*)   | 0.23 ± 0.08 (*)   | <0.001 | 0.96 |
| 21 | Untagged | 830.77 | 520.36 ± 130.67 (*)  | 0.37 ± 0.17 (#)   | 0.28 ± 0.13 (#)   | <0.001 | 0.96 |
| 22 | Untagged | 805    | 375.87 ± 50.49 (**)  | 0.26 ± 0.09 (*)   | 0.27 ± 0.11 (#)   | <0.001 | 0.97 |
| 23 | Untagged | 893.6  | 484.94 ± 99.33 (**)  | 0.35 ± 0.12 (*)   | 0.23 ± 0.1 (#)    | <0.001 | 0.94 |
| 24 | Untagged | 911.3  | 415.58 ± 116.31 (*)  | 0.3 ± 0.2 (NS)    | 0.33 ± 0.18 (NS)  | <0.001 | 0.97 |
| 25 | Untagged | 955    | 418.26 ± 91.19 (*)   | 0.34 ± 0.14 (#)   | 0.28 ± 0.1 (#)    | <0.001 | 0.99 |
| 1  | Tagged   | 219    | 816.95 ± 81.93 (***) | 0.5 ± 0.07 (***)  | 0.28 ± 0.058 (**) | <0.001 | 0.92 |
| 2  | Tagged   | 288.4  | 643.67 ± 98.66 (***) | 0.57 ± 0.11 (**)  | 0.3 ± 0.07 (**)   | <0.001 | 0.96 |
| 3  | Tagged   | 368    | 630.49 ± 60.21 (***) | 0.55 ± 0.07 (***) | 0.25 ± 0.05 (**)  | <0.001 | 0.94 |
| 4  | Tagged   | 379    | 746.1 ± 231.26 (*)   | 0.76 ± 0.33 (#)   | 0.51 ± 0.14 (*)   | <0.001 | 0.99 |
| 5  | Tagged   | 321.2  | 611.8 ± 13.4 (***)   | 0.41 ± 0.01 (***) | 0.17 ± 0.01 (***) | <0.001 | 0.99 |
| 6  | Tagged   | 378    | 727.06 ± 91.1 (***)  | 0.56 ± 0.08 (***) | 0.25 ± 0.05 (**)  | <0.001 | 0.94 |
| 7  | Tagged   | 378    | 732.34 ± 62.68 (***) | 0.58 ± 0.06 (***) | 0.24 ± 0.03 (***) | <0.001 | 0.97 |



|    |        |        |                          |                       |                        |        |      |
|----|--------|--------|--------------------------|-----------------------|------------------------|--------|------|
| 8  | Tagged | 447    | $691.44 \pm 151.74$ (*)  | $0.46 \pm 0.14$ (*)   | $0.27 \pm 0.08$ (*)    | <0.001 | 0.96 |
| 9  | Tagged | 575    | $553.97 \pm 125.34$ (**) | $0.46 \pm 0.16$ (*)   | $0.28 \pm 0.11$ (#)    | <0.001 | 0.93 |
| 10 | Tagged | 560    | $508.17 \pm 13.99$ (***) | $0.25 \pm 0.02$ (***) | $0.14 \pm 0.019$ (***) | <0.001 | 0.99 |
| 11 | Tagged | 675    | $579.9 \pm 74.2$ (**)    | $0.35 \pm 0.07$ (**)  | $0.21 \pm 0.06$ (*)    | <0.001 | 0.96 |
| 12 | Tagged | 660.2  | $418.22 \pm 34.37$ (***) | $0.18 \pm 0.04$ (*)   | $0.16 \pm 0.06$ (#)    | <0.001 | 0.96 |
| 13 | Tagged | 605.86 | $519.37 \pm 38.72$ (***) | $0.24 \pm 0.04$ (**)  | $0.21 \pm 0.06$ (*)    | <0.001 | 0.96 |
| 14 | Tagged | 777.87 | $495.23 \pm 55.15$ (***) | $0.34 \pm 0.06$ (**)  | $0.14 \pm 0.05$ (#)    | <0.001 | 0.89 |
| 15 | Tagged | 738    | $910.7 \pm 533.14$ (NS)  | $0.72 \pm 0.51$ (NS)  | $0.43 \pm 0.17$ (#)    | <0.001 | 0.97 |
| 16 | Tagged | 738    | $564.92 \pm 46.99$ (***) | $0.41 \pm 0.04$ (***) | $0.17 \pm 0.03$ (**)   | <0.001 | 0.97 |
| 17 | Tagged | 747.59 | $452.71 \pm 54.16$ (***) | $0.29 \pm 0.07$ (*)   | $0.18 \pm 0.07$ (#)    | <0.001 | 0.96 |
| 18 | Tagged | 747.59 | $492.12 \pm 167.85$ (#)  | $0.26 \pm 0.22$ (NS)  | $0.35 \pm 0.28$ (NS)   | <0.001 | 0.98 |
| 19 | Tagged | 851.7  | $331.18 \pm 21.55$ (***) | $0.15 \pm 0.03$ (*)   | $0.17 \pm 0.05$ (*)    | <0.001 | 1    |
| 20 | Tagged | 885    | $640.84 \pm 398.29$ (NS) | $0.6 \pm 0.42$ (NS)   | $0.33 \pm 0.17$ (NS)   | <0.001 | 0.94 |
| 21 | Tagged | 885    | $556.85 \pm 292.46$ (NS) | $0.62 \pm 0.38$ (NS)  | $0.33 \pm 0.15$ (NS)   | <0.001 | 0.98 |
| 22 | Tagged | 837    | $450.01 \pm 29.21$ (***) | $0.32 \pm 0.04$ (***) | $0.18 \pm 0.04$ (**)   | <0.001 | 0.97 |
| 23 | Tagged | 803    | $574.55 \pm 321.2$ (NS)  | $0.64 \pm 0.53$ (NS)  | $0.46 \pm 0.21$ (#)    | <0.001 | 0.99 |
| 24 | Tagged | 803    | $538.33 \pm 86.83$ (**)  | $0.56 \pm 0.11$ (**)  | $0.28 \pm 0.06$ (**)   | <0.001 | 0.98 |
| 25 | Tagged | 935    | $481.78 \pm 15.77$ (***) | $0.28 \pm 0.02$ (***) | $0.16 \pm 0.02$ (**)   | <0.001 | 1    |
| 26 | Tagged | 971    | $490.05 \pm 106.94$ (**) | $0.44 \pm 0.17$ (#)   | $0.34 \pm 0.13$ (*)    | <0.001 | 0.97 |
| 27 | Tagged | 902    | $579.85 \pm 137.19$ (**) | $0.49 \pm 0.2$ (#)    | $0.37 \pm 0.13$ (*)    | <0.001 | 0.97 |

**Table S3. (b)** Outputs of sigmoid model for fitting the MO<sub>2</sub> as a function of swimming speed (m/s) during Ucrit for each Gilt-head Sea bream (*Sparus aurata*; n=25 untagged and n=27 tagged fish). P value and R<sup>2</sup> are shown for each model. (a) Estimate, standard error and level of significance are presented for each parameter of the model (Asym, xmid and scal) are also indicated. For the level of significance, not significant (NS) is indicated for p>0.1, # for 0.05 <p<0.1, \* for p<0.05, \*\* for p<0.01 and \*\*\* for p<0.001.

| Fish ID | Condition | Mass (g) | SMR    | MMR    | AS     |
|---------|-----------|----------|--------|--------|--------|
| 1       | Untagged  | 332      | 84.96  | 525.86 | 440.9  |
| 2       | Untagged  | 335      | 58.1   | 669.51 | 611.41 |
| 3       | Untagged  | 339      | 82.4   | 532.85 | 450.45 |
| 4       | Untagged  | 389      | 60.11  | 665.36 | 605.25 |
| 5       | Untagged  | 437.8    | 84.36  | 547.12 | 462.76 |
| 6       | Untagged  | 437.6    | 125.25 | 454.64 | 329.4  |
| 7       | Untagged  | 424      | 76.37  | 631.18 | 554.81 |
| 8       | Untagged  | 432      | 111.13 | 503.23 | 392.1  |
| 9       | Untagged  | 407      | 59.59  | 477.63 | 418.04 |
| 10      | Untagged  | 501.2    | 73.04  | 578.4  | 505.36 |
| 11      | Untagged  | 589.3    | 60.6   | 480.21 | 419.6  |
| 12      | Untagged  | 589.3    | 62.46  | 487.86 | 425.4  |
| 13      | Untagged  | 502      | 145.75 | 465.69 | 319.94 |
| 14      | Untagged  | 504      | 65.29  | 513.56 | 448.26 |
| 15      | Untagged  | 640.4    | 63.83  | 407.24 | 343.41 |
| 16      | Untagged  | 640.21   | 104.49 | 452.94 | 348.46 |
| 17      | Untagged  | 644.89   | 90.19  | 521.47 | 431.29 |
| 18      | Untagged  | 642      | 62.12  | 467.51 | 405.39 |
| 19      | Untagged  | 794.86   | 121.11 | 456.7  | 335.59 |

---

|    |          |        |        |        |        |
|----|----------|--------|--------|--------|--------|
| 20 | Untagged | 782.5  | 123.29 | 427.03 | 303.73 |
| 21 | Untagged | 830.77 | 110.41 | 462.54 | 352.13 |
| 22 | Untagged | 805    | 104.02 | 351.25 | 247.23 |
| 23 | Untagged | 893.6  | 87.09  | 453.44 | 366.35 |
| 24 | Untagged | 911.3  | 118.31 | 365.48 | 247.17 |
| 25 | Untagged | 955    | 96.1   | 357.41 | 261.3  |
| 1  | Tagged   | 219    | 117.69 | 753.71 | 636.02 |
| 2  | Tagged   | 288.4  | 83.82  | 556.6  | 472.78 |
| 3  | Tagged   | 368    | 61.89  | 586.81 | 524.92 |
| 4  | Tagged   | 379    | 135.26 | 517.62 | 382.37 |
| 5  | Tagged   | 321.2  | 52.36  | 604.14 | 551.78 |
| 6  | Tagged   | 378    | 69.98  | 637.57 | 567.59 |
| 7  | Tagged   | 378    | 62.02  | 663.95 | 601.93 |
| 8  | Tagged   | 447    | 106.6  | 592.3  | 485.7  |
| 9  | Tagged   | 575    | 90.04  | 500.58 | 410.54 |
| 10 | Tagged   | 560    | 74.1   | 504.62 | 430.52 |
| 11 | Tagged   | 675    | 91.55  | 543.17 | 451.62 |
| 12 | Tagged   | 660.2  | 101.72 | 414.52 | 312.8  |
| 13 | Tagged   | 605.86 | 125.67 | 506.1  | 380.43 |
| 14 | Tagged   | 777.87 | 38.38  | 485.94 | 447.57 |
| 15 | Tagged   | 738    | 142.09 | 559.62 | 417.53 |
| 16 | Tagged   | 738    | 43.74  | 547.19 | 503.45 |

---

|    |        |        |        |        |        |
|----|--------|--------|--------|--------|--------|
| 17 | Tagged | 747.59 | 73.32  | 441.48 | 368.16 |
| 18 | Tagged | 747.59 | 158.2  | 417.03 | 258.83 |
| 19 | Tagged | 851.7  | 97.53  | 325.74 | 228.21 |
| 20 | Tagged | 885    | 73.27  | 443.28 | 370.01 |
| 21 | Tagged | 885    | 70.34  | 386.18 | 315.84 |
| 22 | Tagged | 837    | 64.46  | 440.66 | 376.15 |
| 23 | Tagged | 803    | 113.25 | 367.94 | 254.69 |
| 24 | Tagged | 803    | 62.8   | 418.87 | 356.06 |
| 25 | Tagged | 935    | 69.64  | 469.22 | 399.59 |
| 26 | Tagged | 971    | 104.75 | 418.51 | 313.76 |
| 27 | Tagged | 902    | 120.25 | 466.86 | 346.61 |

**Table S4.** Outputs of model for fitting the cost of transport (COT, mgO<sub>2</sub>/kg/lm) as function of speed (km/h) during the Ucrit trial for each Gilt-head Sea bream (*Sparus aurata*; n = 52). P value and R<sup>2</sup> were shown for each model, and estimate, standard error and level of significance of each parameter of each model (a and b) are presented, as well the estimated values of U<sub>opt</sub> and COT<sub>min</sub>.

| Estimate ± std. error (significance) |           |          |                      |                   |         |                |                  |                    |  |
|--------------------------------------|-----------|----------|----------------------|-------------------|---------|----------------|------------------|--------------------|--|
| Fish                                 |           |          |                      |                   |         |                |                  |                    |  |
| ID                                   | Condition | Mass (g) | a                    | b                 | P value | R <sup>2</sup> | U <sub>opt</sub> | COT <sub>min</sub> |  |
| 1                                    | Untagged  | 332      | 140.77 ± 16.90 (***) | 0.44 ± 0.06 (***) | <0.001  | 0.59           | 2.29             | 166.91             |  |
| 2                                    | Untagged  | 335      | 103.55 ± 8.63 (***)  | 0.58 ± 0.04 (***) | <0.001  | 0.88           | 1.71             | 164.14             |  |
| 3                                    | Untagged  | 339      | 132.29 ± 13.98 (***) | 0.50 ± 0.06 (***) | <0.001  | 0.71           | 2.00             | 179.73             |  |
| 4                                    | Untagged  | 389      | 114.18 ± 12.58 (***) | 0.53 ± 0.05 (***) | <0.001  | 0.92           | 1.87             | 165.72             |  |
| 5                                    | Untagged  | 437.8    | 148.93 ± 5.29 (***)  | 0.30 ± 0.02 (***) | <0.001  | 0.96           | 3.38             | 119.94             |  |
| 6                                    | Untagged  | 437.6    | 148.19 ± 13.73 (***) | 0.30 ± 0.05 (***) | <0.001  | 0.76           | 3.37             | 119.57             |  |
| 7                                    | Untagged  | 424      | 88.28 ± 12.90 (***)  | 0.61 ± 0.07 (***) | <0.001  | 0.72           | 1.64             | 146.54             |  |
| 8                                    | Untagged  | 432      | 149.63 ± 8.56 (***)  | 0.40 ± 0.03 (***) | <0.001  | 0.91           | 2.50             | 162.77             |  |
| 9                                    | Untagged  | 407      | 97.19 ± 6.92 (***)   | 0.46 ± 0.03 (***) | <0.001  | 0.93           | 2.19             | 120.79             |  |
| 10                                   | Untagged  | 501.2    | 144.75 ± 11.28 (***) | 0.37 ± 0.04 (***) | <0.001  | 0.81           | 2.68             | 146.75             |  |
| 11                                   | Untagged  | 589.3    | 118.48 ± 8.97 (***)  | 0.36 ± 0.04 (***) | <0.001  | 0.89           | 2.78             | 116.05             |  |
| 12                                   | Untagged  | 589.3    | 103.92 ± 10.32 (***) | 0.52 ± 0.05 (***) | <0.001  | 0.84           | 1.92             | 146.74             |  |
| 13                                   | Untagged  | 502      | 165.54 ± 6.79 (***)  | 0.290.03 (***)    | <0.001  | 0.96           | 3.46             | 130.14             |  |

|    |          |        |                          |                        |        |      |      |        |
|----|----------|--------|--------------------------|------------------------|--------|------|------|--------|
| 14 | Untagged | 504    | $76.86 \pm 14.47$ (**)   | $0.63 \pm 0.10$ (**)   | <0.001 | 0.69 | 1.59 | 131.67 |
| 15 | Untagged | 640.4  | $88.63 \pm 6.83$ (***)   | $0.49 \pm 0.04$ (***)  | <0.001 | 0.94 | 2.04 | 118.14 |
| 16 | Untagged | 640.21 | $131.18 \pm 8.45$ (***)  | $0.40 \pm 0.04$ (***)  | <0.001 | 0.92 | 2.48 | 143.85 |
| 17 | Untagged | 644.89 | $176.87 \pm 21.30$ (***) | $0.34 \pm 0.06$ (**)   | <0.001 | 0.88 | 2.93 | 163.91 |
| 18 | Untagged | 642    | $120.01 \pm 12.79$ (***) | $0.49 \pm 0.07$ (***)  | <0.001 | 0.81 | 2.06 | 158.50 |
| 19 | Untagged | 794.86 | $145.62 \pm 9.11$ (***)  | $0.41 \pm 0.04$ (***)  | <0.001 | 0.92 | 2.44 | 161.91 |
| 20 | Untagged | 782.5  | $144.07 \pm 20.81$ (***) | $0.39 \pm 0.09$ (**)   | <0.001 | 0.49 | 2.56 | 152.77 |
| 21 | Untagged | 830.77 | $145.53 \pm 7.35$ (***)  | $0.39 \pm 0.03$ (***)  | <0.001 | 0.95 | 2.58 | 153.17 |
| 22 | Untagged | 805    | $140.29 \pm 7.37$ (***)  | $0.30 \pm 0.03$ (***)  | <0.001 | 0.96 | 3.38 | 112.75 |
| 23 | Untagged | 893.6  | $129.97 \pm 10.09$ (***) | $0.43 \pm 0.05$ (***)  | <0.001 | 0.89 | 2.33 | 151.39 |
| 24 | Untagged | 911.3  | $138.36 \pm 7.40$ (***)  | $0.33 \pm 0.04$ (***)  | <0.001 | 0.95 | 3.01 | 124.80 |
| 25 | Untagged | 955    | $120.50 \pm 6.68$ (***)  | $0.40 \pm 0.04$ (***)  | <0.001 | 0.96 | 2.47 | 132.52 |
| 1  | Tagged   | 219    | $170.65 \pm 12.18$ (***) | $0.41 \pm 0.03$ (***)  | <0.001 | 0.77 | 2.46 | 188.45 |
| 2  | Tagged   | 288.4  | $105.90 \pm 7.64$ (***)  | $0.47 \pm 0.03$ (***)  | <0.001 | 0.91 | 2.12 | 135.69 |
| 3  | Tagged   | 368    | $116.34 \pm 8.24$ (***)  | $0.42 \pm 0.03$ (***)  | <0.001 | 0.89 | 2.37 | 133.51 |
| 4  | Tagged   | 379    | $146.39 \pm 4.35$ (***)  | $0.33 \pm 0.016$ (***) | <0.001 | 0.98 | 3.03 | 131.47 |
| 5  | Tagged   | 321.2  | $100.84 \pm 16.35$ (***) | $0.56 \pm 0.07$ (***)  | <0.001 | 0.53 | 1.79 | 153.01 |
| 6  | Tagged   | 378    | $104.90 \pm 9.09$ (***)  | $0.52 \pm 0.04$ (***)  | <0.001 | 0.86 | 1.91 | 149.11 |
| 7  | Tagged   | 378    | $93.50 \pm 8.81$ (***)   | $0.56 \pm 0.04$ (***)  | <0.001 | 0.86 | 1.80 | 141.48 |
| 8  | Tagged   | 447    | $130.38 \pm 9.68$ (***)  | $0.52 \pm 0.05$ (***)  | <0.001 | 0.88 | 1.91 | 185.30 |
| 9  | Tagged   | 575    | $139.81 \pm 16.62$ (***) | $0.37 \pm 0.07$ (**)   | <0.001 | 0.70 | 2.69 | 141.22 |
| 10 | Tagged   | 560    | $151.58 \pm 18.48$ (***) | $0.43 \pm 0.07$ (***)  | <0.001 | 0.59 | 2.32 | 177.82 |
| 11 | Tagged   | 675    | $135.30 \pm 10.36$ (***) | $0.50 \pm 0.05$ (***)  | <0.001 | 0.87 | 1.99 | 185.04 |
| 12 | Tagged   | 660.2  | $165.30 \pm 16.53$ (***) | $0.37 \pm 0.07$ (**)   | <0.001 | 0.73 | 2.70 | 166.37 |
| 13 | Tagged   | 605.86 | $176.67 \pm 12.64$ (***) | $0.37 \pm 0.05$ (***)  | <0.001 | 0.82 | 2.73 | 175.66 |
| 14 | Tagged   | 777.87 | $108.12 \pm 16.79$ (**)  | $0.55 \pm 0.09$ (**)   | <0.001 | 0.64 | 1.80 | 162.86 |
| 15 | Tagged   | 738    | $153.63 \pm 7.34$ (***)  | $0.42 \pm 0.03$ (***)  | <0.001 | 0.94 | 2.40 | 174.20 |
| 16 | Tagged   | 738    | $93.65 \pm 11.66$ (***)  | $0.62 \pm 0.07$ (***)  | <0.001 | 0.81 | 1.61 | 158.16 |
| 17 | Tagged   | 747.59 | $117.56 \pm 11.83$ (***) | $0.49 \pm 0.06$ (**)   | <0.001 | 0.85 | 2.05 | 155.62 |
| 18 | Tagged   | 747.59 | $198.11 \pm 12.07$ (***) | $0.26 \pm 0.03$ (**)   | <0.001 | 0.98 | 3.87 | 139.18 |
| 19 | Tagged   | 851.7  | $142.10 \pm 9.04$ (***)  | $0.36 \pm 0.05$ (**)   | <0.001 | 0.94 | 2.77 | 139.40 |
| 20 | Tagged   | 885    | $107.17 \pm 9.86$ (***)  | $0.45 \pm 0.06$ (***)  | <0.001 | 0.90 | 2.23 | 130.71 |
| 21 | Tagged   | 885    | $94.33 \pm 6.61$ (***)   | $0.45 \pm 0.04$ (***)  | <0.001 | 0.96 | 2.21 | 115.87 |
| 22 | Tagged   | 837    | $109.50 \pm 15.65$ (***) | $0.47 \pm 0.07$ (***)  | <0.001 | 0.69 | 2.12 | 140.22 |
| 23 | Tagged   | 803    | $121.16 \pm 6.00$ (***)  | $0.37 \pm 0.03$ (***)  | <0.001 | 0.97 | 2.73 | 120.54 |
| 24 | Tagged   | 803    | $87.32 \pm 4.96$ (***)   | $0.50 \pm 0.03$ (***)  | <0.001 | 0.97 | 2.01 | 117.97 |
| 25 | Tagged   | 935    | $116.14 \pm 14.40$ (**)  | $0.58 \pm 0.08$ (**)   | <0.001 | 0.78 | 1.72 | 183.66 |
| 26 | Tagged   | 971    | $134.85 \pm 5.76$ (***)  | $0.34 \pm 0.03$ (***)  | <0.001 | 0.97 | 2.97 | 123.44 |
| 27 | Tagged   | 902    | $146.59 \pm 4.90$ (***)  | $0.34 \pm 0.02$ (***)  | <0.001 | 0.98 | 2.91 | 137.08 |

**Table S5.** Outputs of exponential model for fitting the swimming activity (arbitrary unit, AU) recorded by tag as a function of swimming speed (m/s) during Ucrit trial for each Gilt-head Sea bream (*Sparus aurata*; n=23 tagged fish). P value and R<sup>2</sup> were shown for each model. Estimate, standard error and level of significance are presented for each parameter of the model ( $\alpha$  and  $\beta$ ). For the level of significance, not significant (NS) is indicated for  $p>0.1$ , # for  $0.05 < p < 0.1$ , \* for  $p < 0.05$ , \*\* for  $p < 0.01$  and \*\*\* for  $p < 0.001$ .

| Fish ID | Mass   | Estimate $\pm$ std. error (significance) |                       | p value | R <sup>2</sup> |
|---------|--------|------------------------------------------|-----------------------|---------|----------------|
|         |        | $\alpha$                                 | $\beta$               |         |                |
| 1       | 219    | 17.93 $\pm$ 3.20 (***)                   | 1.84 $\pm$ 0.18 (***) | <0.001  | 0.98           |
| 2       | 288.4  | 5.59 $\pm$ 1.25 (***)                    | 3.27 $\pm$ 0.23 (***) | <0.001  | 0.99           |
| 3       | 368    | 12.65 $\pm$ 1.75 (***)                   | 2.39 $\pm$ 0.13 (***) | <0.001  | 0.98           |
| 4       | 379    | 4.37 $\pm$ 0.80 (***)                    | 3.41 $\pm$ 0.17 (***) | <0.001  | 0.99           |
| 5       | 321.2  | 9.16 $\pm$ 1.67 (***)                    | 2.47 $\pm$ 0.18 (***) | <0.001  | 0.99           |
| 6       | 378    | 7.27 $\pm$ 1.20 (***)                    | 3.13 $\pm$ 0.17 (***) | <0.001  | 0.99           |
| 7       | 378    | 9.28 $\pm$ 1.66 (***)                    | 2.82 $\pm$ 0.17 (***) | <0.001  | 0.98           |
| 8       | 447    | 14.67 $\pm$ 4.56 (*)                     | 2.79 $\pm$ 0.37 (***) | <0.001  | 0.93           |
| 9       | 575    | 8.88 $\pm$ 1.31 (***)                    | 2.88 $\pm$ 0.15 (***) | <0.001  | 0.99           |
| 10      | 560    | 19.52 $\pm$ 4.91 (**)                    | 2.45 $\pm$ 0.26 (***) | <0.001  | 0.91           |
| 11      | 675    | 11.02 $\pm$ 2.41 (**)                    | 3.17 $\pm$ 0.25 (***) | <0.001  | 0.97           |
| 12      | 660.2  | 12.84 $\pm$ 2.58 (**)                    | 2.86 $\pm$ 0.23 (***) | <0.001  | 0.98           |
| 14      | 777.87 | 6.00 $\pm$ 1.41 (**)                     | 3.86 $\pm$ 0.30 (***) | <0.001  | 0.99           |
| 15      | 738    | 7.72 $\pm$ 1.34 (**)                     | 3.45 $\pm$ 0.19 (***) | <0.001  | 0.99           |
| 16      | 738    | 13.99 $\pm$ 2.10 (**)                    | 2.43 $\pm$ 0.20 (***) | <0.001  | 0.99           |
| 17      | 747.59 | 9.23 $\pm$ 3.08 (*)                      | 3.25 $\pm$ 0.36 (***) | <0.001  | 0.94           |
| 18      | 747.59 | 3.63 $\pm$ 0.84 (**)                     | 4.23 $\pm$ 0.25 (***) | <0.001  | 0.99           |
| 19      | 851.7  | 9.14 $\pm$ 2.25 (**)                     | 3.16 $\pm$ 0.32 (***) | <0.001  | 0.98           |

|    |     |                        |                       |        |      |
|----|-----|------------------------|-----------------------|--------|------|
| 22 | 837 | $11.55 \pm 2.64$ (**)  | $2.95 \pm 0.26$ (***) | <0.001 | 0.97 |
| 23 | 803 | $15.19 \pm 3.04$ (**)  | $2.45 \pm .23$ (***)  | <0.001 | 0.98 |
| 24 | 803 | $15.04 \pm 2.30$ (***) | $2.36 \pm 0.18$ (***) | <0.001 | 0.99 |
| 25 | 935 | $24.53 \pm 2.01$ (***) | $1.98 \pm 0.11$ (***) | <0.001 | 1.00 |
| 26 | 971 | $14.14 \pm 1.90$ (***) | $2.52 \pm 0.13$ (***) | <0.001 | 0.98 |
